# Supplementary material for: Context-Specific Metabolic Model Extraction Based on Regularized Least Squares Optimization
Source: PubMed Central journal article supplement (PMC4497637; doi:10.1371/journal.pone.0131875), 2015-07-09

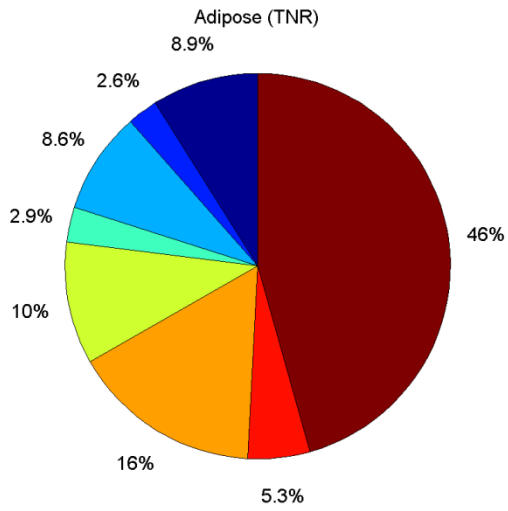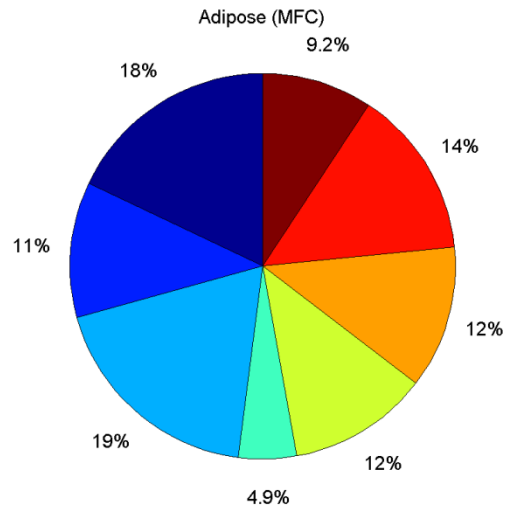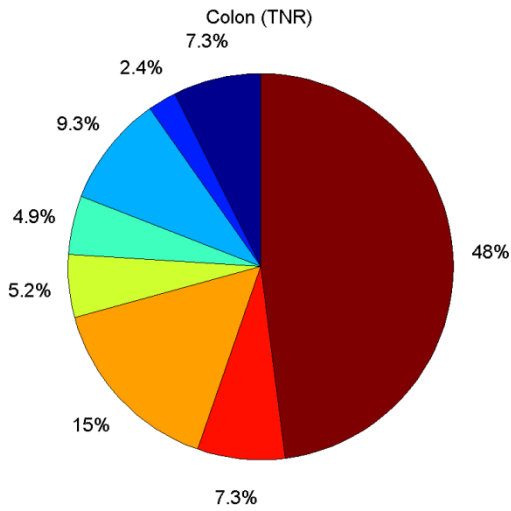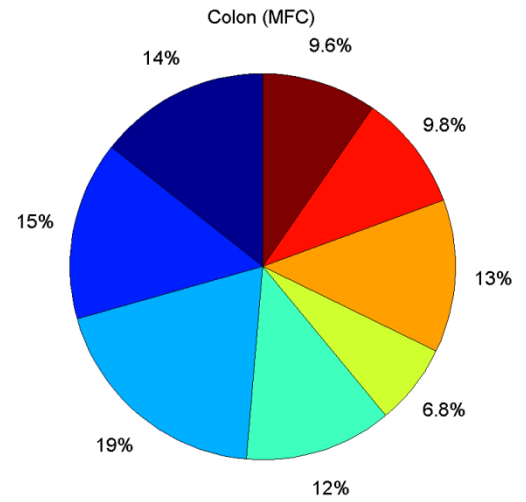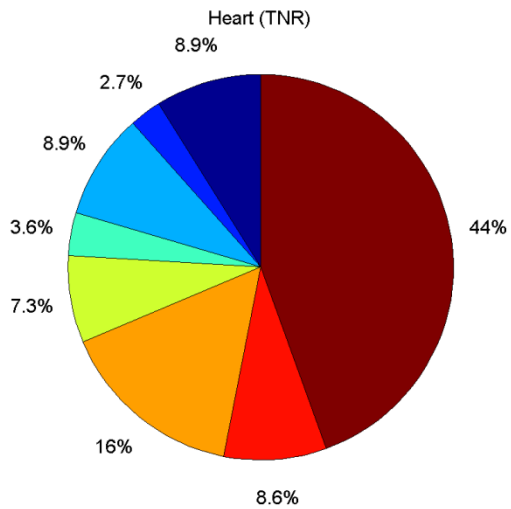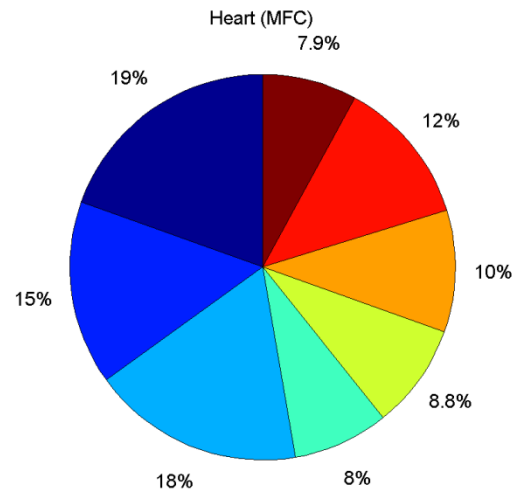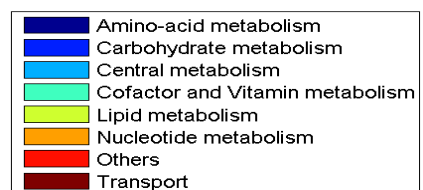

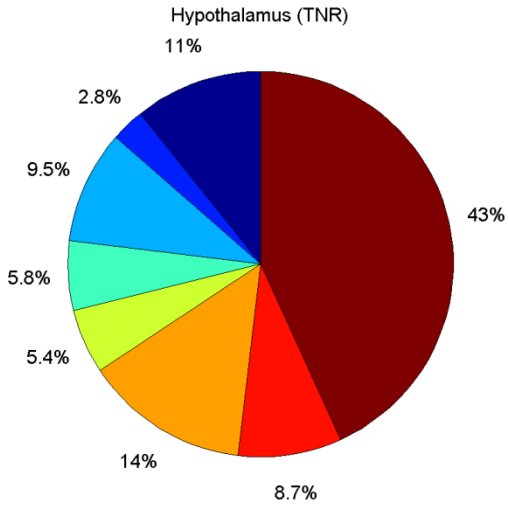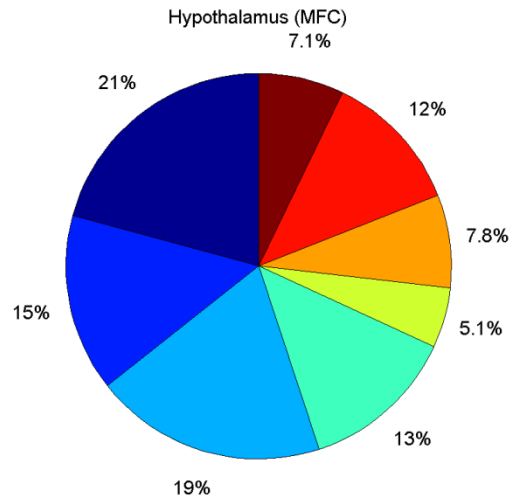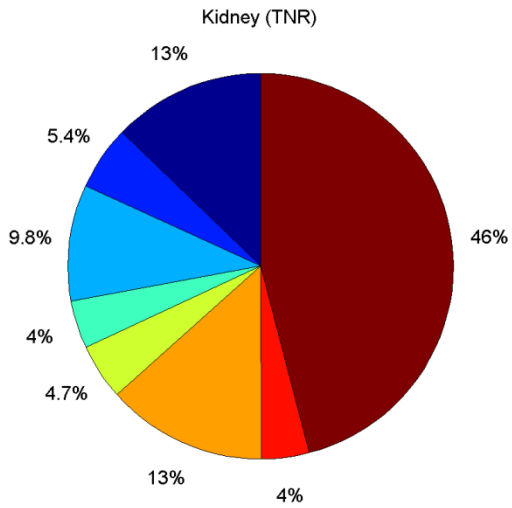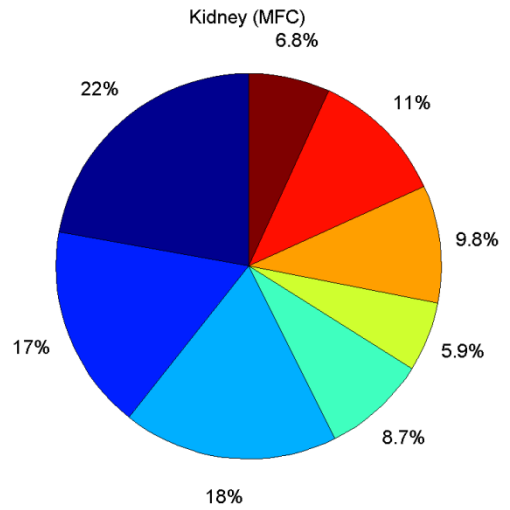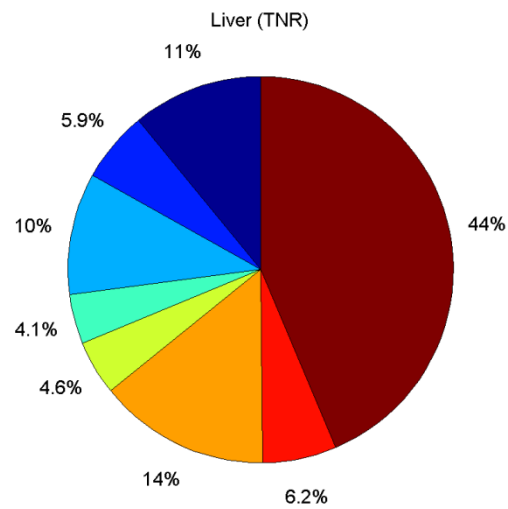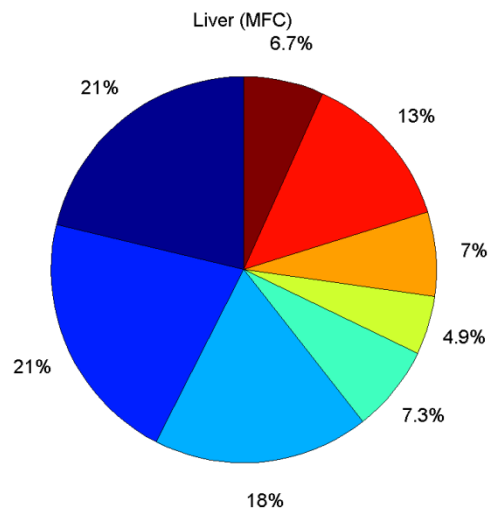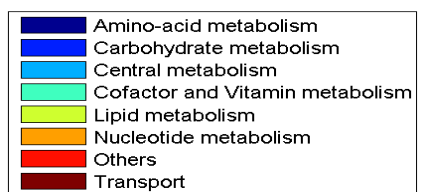

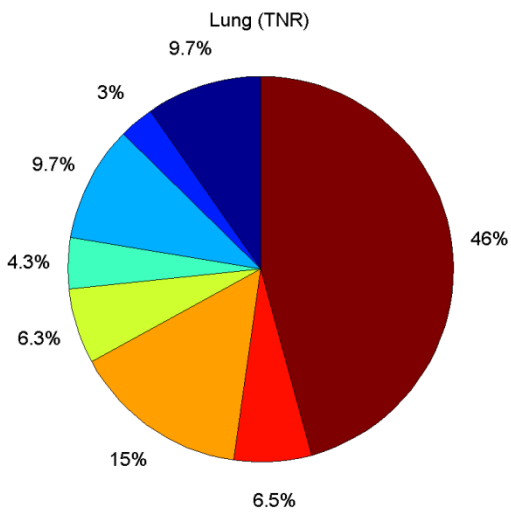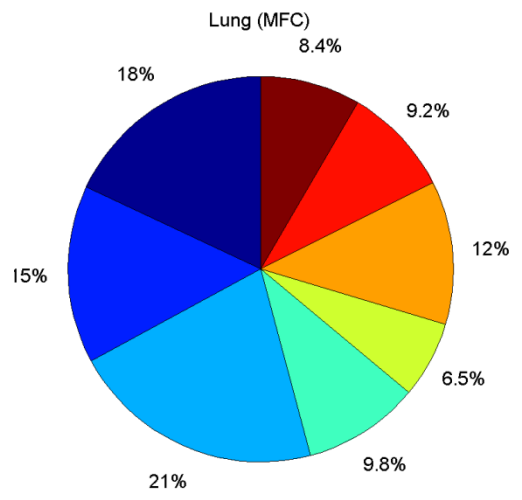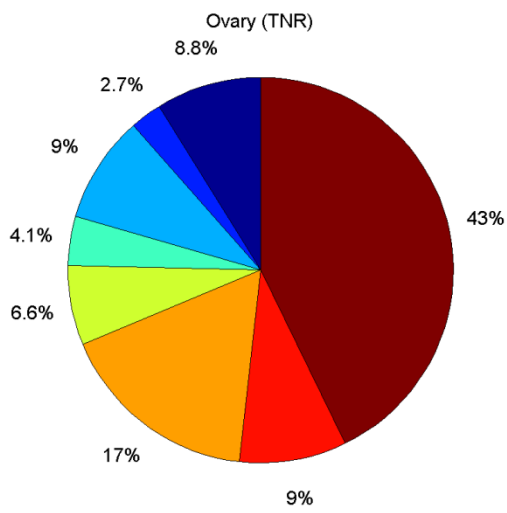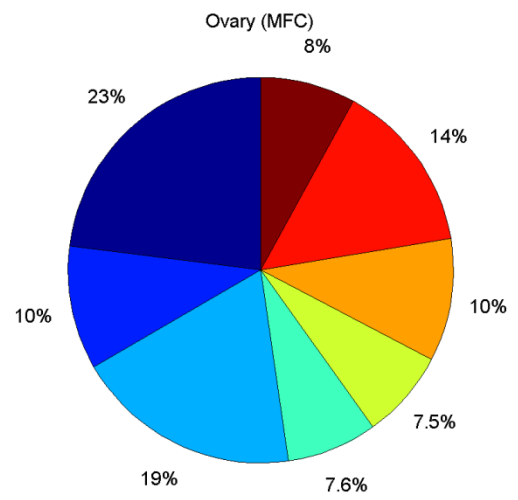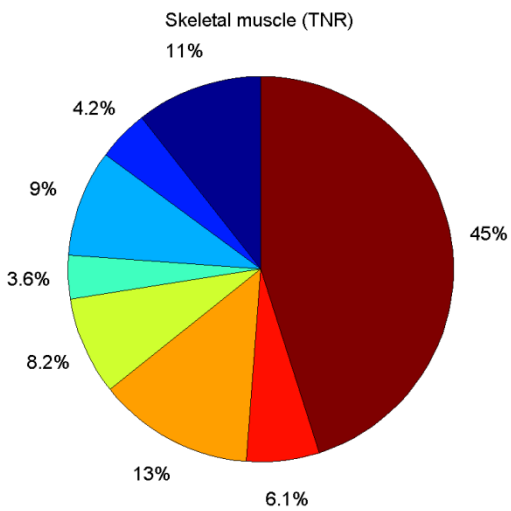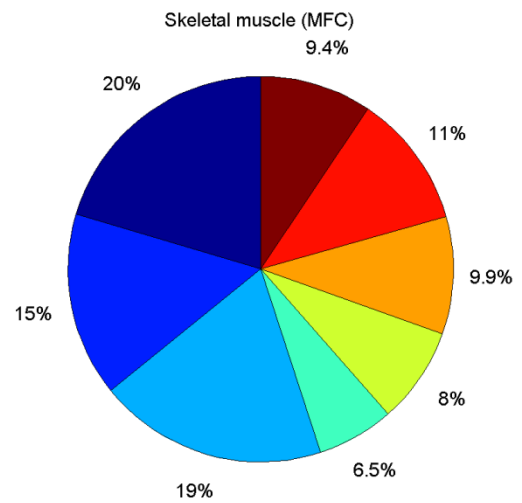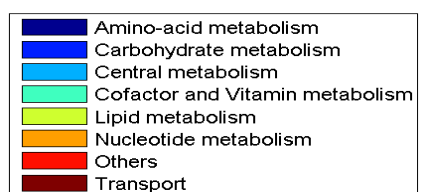

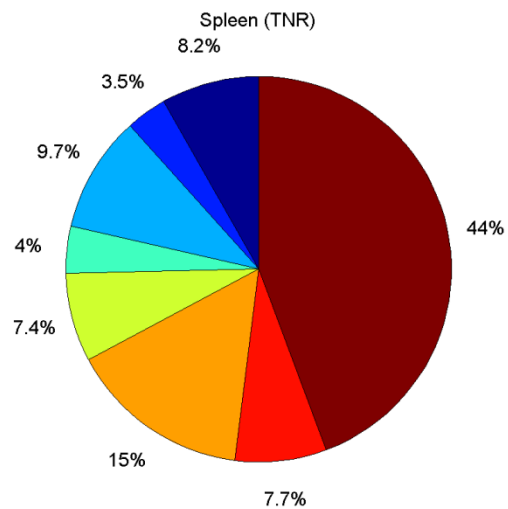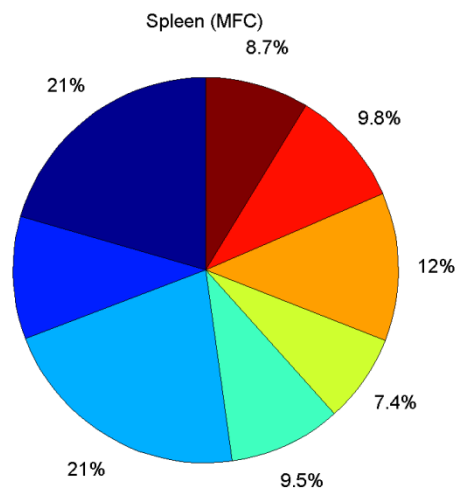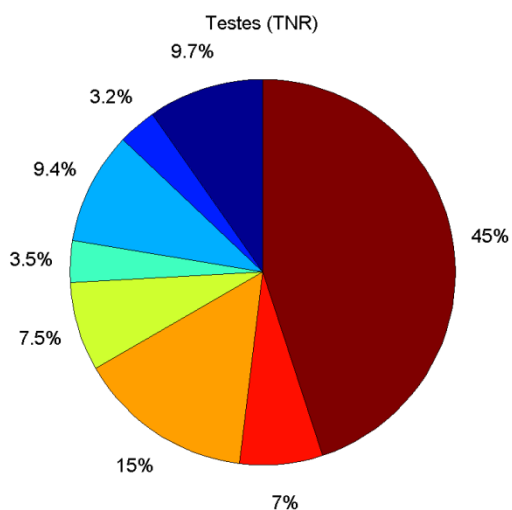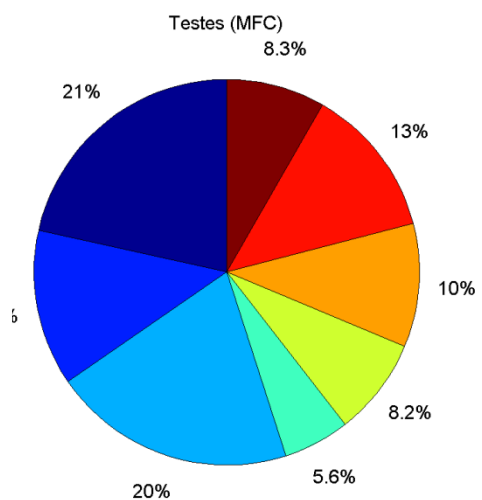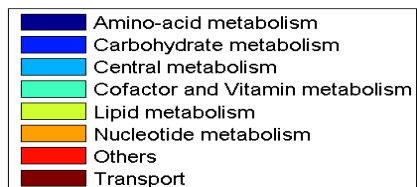

Supplement: pone.0131875.s001.pdf [file pone.0131875.s001.pdf]
