# Supplementary material for: Context-Specific Metabolic Model Extraction Based on Regularized Least Squares Optimization
Source: PLoS One. 2015 Jul 9;10(7):e0131875. doi: 10.1371/journal.pone.0131875 (PMC4497637; doi:10.1371/journal.pone.0131875)
Supplement: S1 Table — Global characteristics of the models derived by RegrEx (with automated determination of λ), RegrEx-λ0 (i.e., RegrEx without regularization), Lee2012, FastCORE and iMAT are collected in tables A, B, C, D and E, respectively. The abbreviations stand for the following: Card, denotes cardinality, #ExRxns., number of exclusive reactions, #Genes, number of genes, OrphRatio, data-orphan ratio, Cor(V,D), correlation between data and flux values, Res, mean residual value between fluxes and data, IJaccard, mean Jaccard index to any other context (values in brackets correspond to the standard deviation), and Lambda, represents the obtained optimum λ-value. (XLSX) [file pone.0131875.s004.xlsx]

## Sheet: Sheet1
S1 Table. Comparison of models extracted by the four evaluated contending methods: Detailed values for each context.
A	'RegrEx'	'Adipose'	'Colon'	'Heart'	'Hypothalamus'	'Kidney'	'Liver'	'Lung'	'Ovary'	'Skeletal_muscle'	'Spleen'	'Testes'	'Mean(Std)'
	'Card'	'928'	'757'	'834'	'881'	'808'	'821'	'843'	'758'	'905'	'878'	'859'	'842.9091(55.1406)'
	'#ExRxns'	'46'	'35'	'4'	'37'	'18'	'99'	'24'	'11'	'25'	'25'	'8'	'332'
	'#Genes'	'864'	'796'	'860'	'933'	'820'	'805'	'884'	'791'	'893'	'908'	'801'	'850.4545(50.274)'
	'OrphRatio'	'0.4103'	'0.3097'	'0.3238'	'0.343'	'0.2785'	'0.3503'	'0.3234'	'0.3322'	'0.4388'	'0.3697'	'0.3135'	'0.34483(0.046322)'
	'Cor(V,D)'	'0.4249'	'0.4275'	'0.4683'	'0.3814'	'0.3437'	'0.3184'	'0.4718'	'0.3909'	'0.5807'	'0.4276'	'0.387'	'0.4202(0.071093)'
	'Res'	'0.278(0.24547)'	'0.2307(0.21972)'	'0.281(0.25536)'	'0.3304(0.29866)'	'0.3893(0.30751)'	'0.4678(0.36545)'	'0.2315(0.21224)'	'0.1956(0.21146)'	'0.1805(0.1922)'	'0.2961(0.26816)'	'0.2769(0.2773)'	'0.28707(0.084428)'
	'IJaccard'	'0.5608(0.043864)'	'0.5561(0.049454)'	'0.5993(0.056873)'	'0.5752(0.054328)'	'0.5504(0.019725)'	'0.4716(0.034252)'	'0.5825(0.067468)'	'0.5589(0.057622)'	'0.5542(0.048532)'	'0.5964(0.06224)'	'0.6123(0.052203)'	'0.56526(0.037414)'
	'Shared'												299'
	'Lambda'	'0.2'	'0.2'	'0.2'	'0.17'	'0.19'	'0.2'	'0.2'	'0.19'	'0.11'	'0.2'	'0.2'	'0.18727(0.027236)'
B	'RegrExL0'	'Adipose'	'Colon'	'Heart'	'Hypothalamus'	'Kidney'	'Liver'	'Lung'	'Ovary'	'Skeletal_muscle'	'Spleen'	'Testes'	'Mean(Std)'
	'Card'	'928'	'1023'	'1039'	'965'	'1116'	'1035'	'1141'	'1109'	'902'	'1060'	'1015'	'1030.2727(76.3218)'
	'#ExRxns'	'5'	'33'	'7'	'24'	'37'	'52'	'34'	'4'	'9'	'34'	'0'	'239'
	'#Genes'	'856'	'935'	'968'	'971'	'961'	'849'	'944'	'964'	'967'	'926'	'901'	'931.0909(44.3992)'
	'OrphRatio'	'0.4545'	'0.4656'	'0.4552'	'0.4339'	'0.5'	'0.4978'	'0.5503'	'0.4906'	'0.4227'	'0.5165'	'0.4316'	'0.47442(0.039972)'
	'Cor(V,D)'	'0.3792'	'0.3928'	'0.4318'	'0.3357'	'0.3028'	'0.2718'	'0.4413'	'0.3581'	'0.5528'	'0.3937'	'0.3435'	'0.38213(0.07619)'
	'Res'	'0.2697(0.24669)'	'0.2192(0.22008)'	'0.2713(0.25471)'	'0.3291(0.30173)'	'0.3756(0.31078)'	'0.4481(0.37435)'	'0.2209(0.2092)'	'0.1817(0.2099)'	'0.1799(0.19401)'	'0.2864(0.26796)'	'0.2709(0.27344)'	'0.27753(0.081782)'
	'IJaccard'	'0.6427(0.023255)'	'0.6435(0.029459)'	'0.6576(0.032623)'	'0.6408(0.021662)'	'0.6461(0.035566)'	'0.6093(0.025272)'	'0.6607(0.055415)'	'0.6844(0.047799)'	'0.5982(0.029509)'	'0.6493(0.042651)'	'0.6808(0.037989)'	'0.64669(0.025902)'
	'Shared'												490'
C	'Lee2012'	'Adipose'	'Colon'	'Heart'	'Hypothalamus'	'Kidney'	'Liver'	'Lung'	'Ovary'	'Skeletal_muscle'	'Spleen'	'Testes'	'Mean(Std)'
	'Card'	'793'	'806'	'810'	'776'	'783'	'738'	'799'	'752'	'766'	'779'	'829'	'784.6364(26.534)'
	'#ExRxns'	'13'	'9'	'10'	'15'	'15'	'4'	'27'	'2'	'6'	'12'	'27'	'140'
	'#Genes'	'715'	'733'	'741'	'785'	'822'	'773'	'763'	'709'	'761'	'714'	'835'	'759.1818(42.5413)'
	'OrphRatio'	'0.3064'	'0.2594'	'0.2939'	'0.2742'	'0.237'	'0.297'	'0.2683'	'0.245'	'0.2983'	'0.3226'	'0.2715'	'0.27942(0.02659)'
	'Cor(V,D)'	'0.1657'	'0.1154'	'0.1794'	'0.1376'	'0.1108'	'0.107'	'0.1714'	'0.008081'	'0.1895'	'0.1677'	'0.06896'	'0.12925(0.054907)'
	'IJaccard'	'0.7811(0.026547)'	'0.7766(0.028362)'	'0.7899(0.023061)'	'0.7714(0.020373)'	'0.7539(0.016812)'	'0.7423(0.027144)'	'0.7463(0.028999)'	'0.7672(0.016742)'	'0.7658(0.023317)'	'0.7726(0.027915)'	'0.767(0.016706)'	'0.76674(0.014409)'
	'Shared'												509'
D	FastCORE '	'Adipose'	'Colon'	'Heart'	'Hypothalamus'	'Kidney'	'Liver'	'Lung'	'Ovary'	'Skeletal_muscle'	'Spleen'	'Testes'	'Mean(Std)'
	'#Rxns'	'1394'	'1359'	'1302'	'1332'	'1415'	'1372'	'1407'	'1316'	'1316'	'1381'	'1343'	'1357.9091(39.0345)'
	'#ExRxns'	'18'	'13'	'12'	'12'	'41'	'90'	'17'	'0'	'7'	'18'	'2'	'230'
	'#Genes'	'1093'	'1114'	'1097'	'1136'	'1123'	'954'	'1130'	'1069'	'1080'	'1023'	'1058'	'1079.7273(53.6919)'
	'OrphRatio'	'0.5455'	'0.4918'	'0.4451'	'0.4621'	'0.5053'	'0.6009'	'0.5048'	'0.4887'	'0.5267'	'0.4818'	'0.4519'	'0.50041(0.045067)'
	'IJaccard'	'0.6285(0.049583)'	'0.6103(0.069253)'	'0.6341(0.064869)'	'0.6097(0.078099)'	'0.5713(0.027007)'	'0.4946(0.040696)'	'0.6428(0.065037)'	'0.6539(0.071111)'	'0.6271(0.052218)'	'0.6451(0.078016)'	'0.651(0.071409)'	'0.61532(0.046514)'
	'Shared'												503'
E	iMAT'	'Adipose'	'Colon'	'Heart'	'Hypothalamus'	'Kidney'	'Liver'	'Lung'	'Ovary'	'Skeletal_muscle'	'Spleen'	'Testes'	'Mean(Std)'
	'#Rxns'	'1405'	'1447'	'1379'	'1367'	'1487'	'1429'	'1462'	'1388'	'1351'	'1409'	'1397'	'1411(41.6197)'
	'#ExRxns'	'9'	'8'	'13'	'8'	'41'	'93'	'18'	'0'	'1'	'17'	'2'	'210'
	'#Genes'	'1143'	'1190'	'1196'	'1152'	'1236'	'1032'	'1174'	'1141'	'1169'	'1110'	'1154'	'1154.2727(52.4616)'
	'OrphRatio'	'0.4366'	'0.4035'	'0.3749'	'0.3753'	'0.4409'	'0.5235'	'0.4236'	'0.4207'	'0.4511'	'0.409'	'0.3928'	'0.42289(0.041805)'
	'Cor(V,D)'	'-0.1522'	'-0.1945'	'-0.1848'	'-0.1471'	'-0.1923'	'-0.2483'	'-0.1698'	'-0.1443'	'-0.1698'	'-0.1562'	'-0.172'	'-0.17557(0.029653)'
	'IJaccard'	'0.658(0.044469)'	'0.6622(0.064431)'	'0.6732(0.057418)'	'0.654(0.068367)'	'0.619(0.021766)'	'0.5414(0.034786)'	'0.675(0.056306)'	'0.6905(0.06244)'	'0.6578(0.045847)'	'0.6653(0.070892)'	'0.6907(0.069427)'	'0.65337(0.041966)'
	'Shared'												611'
