# Supplementary material for: Context-Specific Metabolic Model Extraction Based on Regularized Least Squares Optimization
Source: PLoS One. 2015 Jul 9;10(7):e0131875. doi: 10.1371/journal.pone.0131875 (PMC4497637; doi:10.1371/journal.pone.0131875)
Supplement: S5 Table — Z-score values of the associated expression data are displayed for the 8 subsystems with unique representation across contexts. The z-scores represent the deviations from the mean of the total sum of data values in each subsystem across contexts. The values highlighted in red correspond to the contexts where RegrEx uniquely assigns each subsystem. In all cases, these contexts present an extreme total sum of data values, as reflected in the highest z-score value as compared with the rest of the contexts. (XLSX) [file pone.0131875.s008.xlsx]

## Sheet: Sheet1
S5 Table. Associated gene expression data for subsystems present only in one context.
Z-scores values are presented for all contexts and the 8 subsystems with unique representation across the 11 contexts. The z-scores correspond
to the distribution of the sum of data values for the reactions in each subsystem (i.e., each subsystem has a total expression value computed as the
sum of individual reaction expression values)
Subsystem (Recon1)/Context	'Adipose'	'Colon'	'Heart'	'Hypothalamus'	'Kidney'	'Liver'	'Lung'	'Ovary'	'Skeletal muscle'	'Spleen'	'Testes'
Bile acid biosynthesis	'-0.207'	'-0.534'	'-0.427'	'-0.154'	'0.294'	'2.9'	'0.0417'	'-0.449'	'-0.667'	'-0.34'	'-0.458'
Biotin metabolism	'0.111'	'-0.937'	'-1.15'	'1.96'	'0.919'	'0.413'	'-0.952'	'-1.25'	'-0.031'	'0.33'	'0.58'
Riboflavin metabolism	'-0.0365'	'-1.31'	'0.00459'	'0.497'	'0.939'	'2.03'	'-0.751'	'-0.739'	'-1.17'	'-0.195'	'0.726'
Vitamin B6 metabolism	'0.202'	'-0.616'	'-0.455'	'2.69'	'0.333'	'0.525'	'-0.419'	'-0.517'	'-0.95'	'-0.634'	'-0.154'
Vitamin D	'-0.199'	'-0.418'	'-0.626'	'-0.384'	'2.73'	'0.788'	'0.226'	'-0.487'	'-0.556'	'-0.573'	'-0.5'
CYP	'-0.298'	'0.0866'	'-0.658'	'-0.524'	'0.486'	'2.79'	'0.0493'	'-0.561'	'-0.734'	'-0.113'	'-0.528'
Methionine metabolism	'-1'	'-1.36'	'-0.0303'	'0.628'	'0.759'	'2.23'	'-0.96'	'0.202'	'-0.458'	'0.0491'	'-0.0554'
D-Alanine metabolism	'0.213'	'-0.651'	'0.469'	'-0.633'	'1.83'	'1.53'	'-1.04'	'-1.04'	'-0.889'	'-0.245'	'0.461'
